# Supplementary material for: Glycoprotein nonmetastatic melanoma protein B regulates lysosomal integrity and lifespan of senescent cells
Source: Sci Rep. 2022 Apr 20;12:6522. doi: 10.1038/s41598-022-10522-3 (PMC9021310; doi:10.1038/s41598-022-10522-3)
Supplement: Supplementary file 2 — Supplementary Information 2. [file 41598_2022_10522_MOESM2_ESM.pdf]

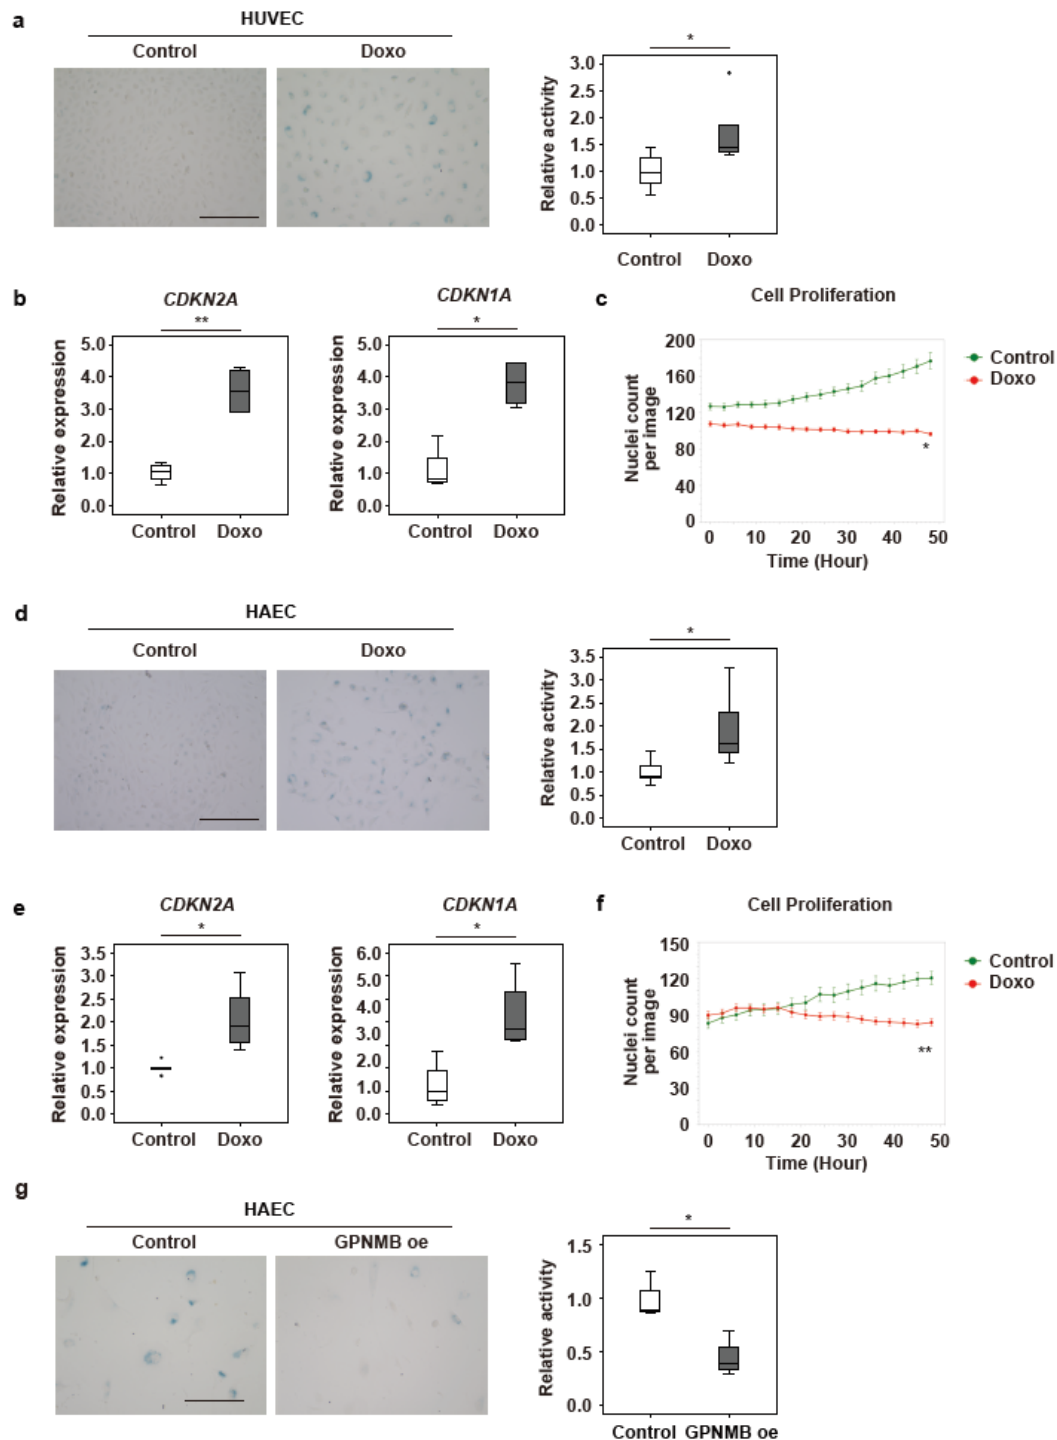

**Supplementary Figure 1. Doxorubicin-induced premature senescence.**

**a-c**, HUVECs were treated with 100 nM of doxorubicin (Doxo) for 72 hours twice, followed by the incubation without treatment for 7 days. SA- $\beta$ -gal activity (**a**,  $n=6$ , 6), expression of *CDKN2A* and *CDKN1A* (**b**,  $n=4$ , 4), and cell proliferation (**c**,  $n=6$ , 6) were examined. **d-f**, Human aortic endothelial cells (HAECs) were treated with 100 nM of doxorubicin as indicated in Supplementary Fig. 1a. SA- $\beta$ -gal activity (**d**,  $n=6$ , 6), expression of *CDKN2A* and *CDKN1A* (**e**,  $n=5$ , 5), and cell proliferation (**f**,  $n=6$ , 6) were examined. **g**, SA- $\beta$ -gal assay of HAECs infected with a GPNMB overexpression vector

(GPNMB oe) or a control vector (Control) after treatment with doxorubicin as indicated in Supplementary Fig. 1a (n=3, 3). Data were analyzed by the two-tailed Student's t-test (**a, b, d, e, g**) or by repeated measures ANOVA analysis (**c, f**). \*P<0.05, \*\*P<0.01. The data are shown as box and whisker plots (**a, b, d, e, g**) or the mean  $\pm$  SD (**c, f**). Scale bar=200  $\mu$  m.

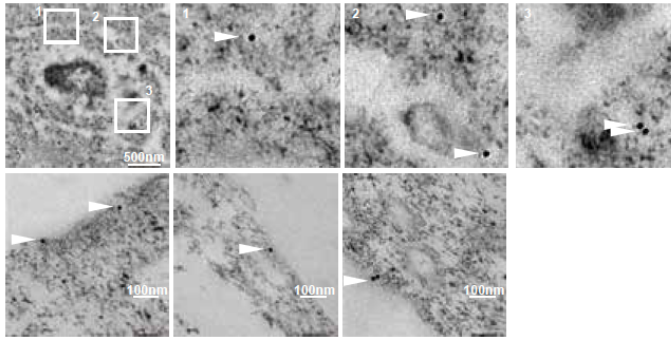

**Supplementary Figure 2. Immunoelectron microscopy.**

Immunoelectron microscopy labeling mCherry (arrow heads) in HUVECs overexpressing GPNMB-mCherry. GPNMB-mCherry was localized in the lysosomes (upper panels) as well as in the plasma membrane (lower panels).

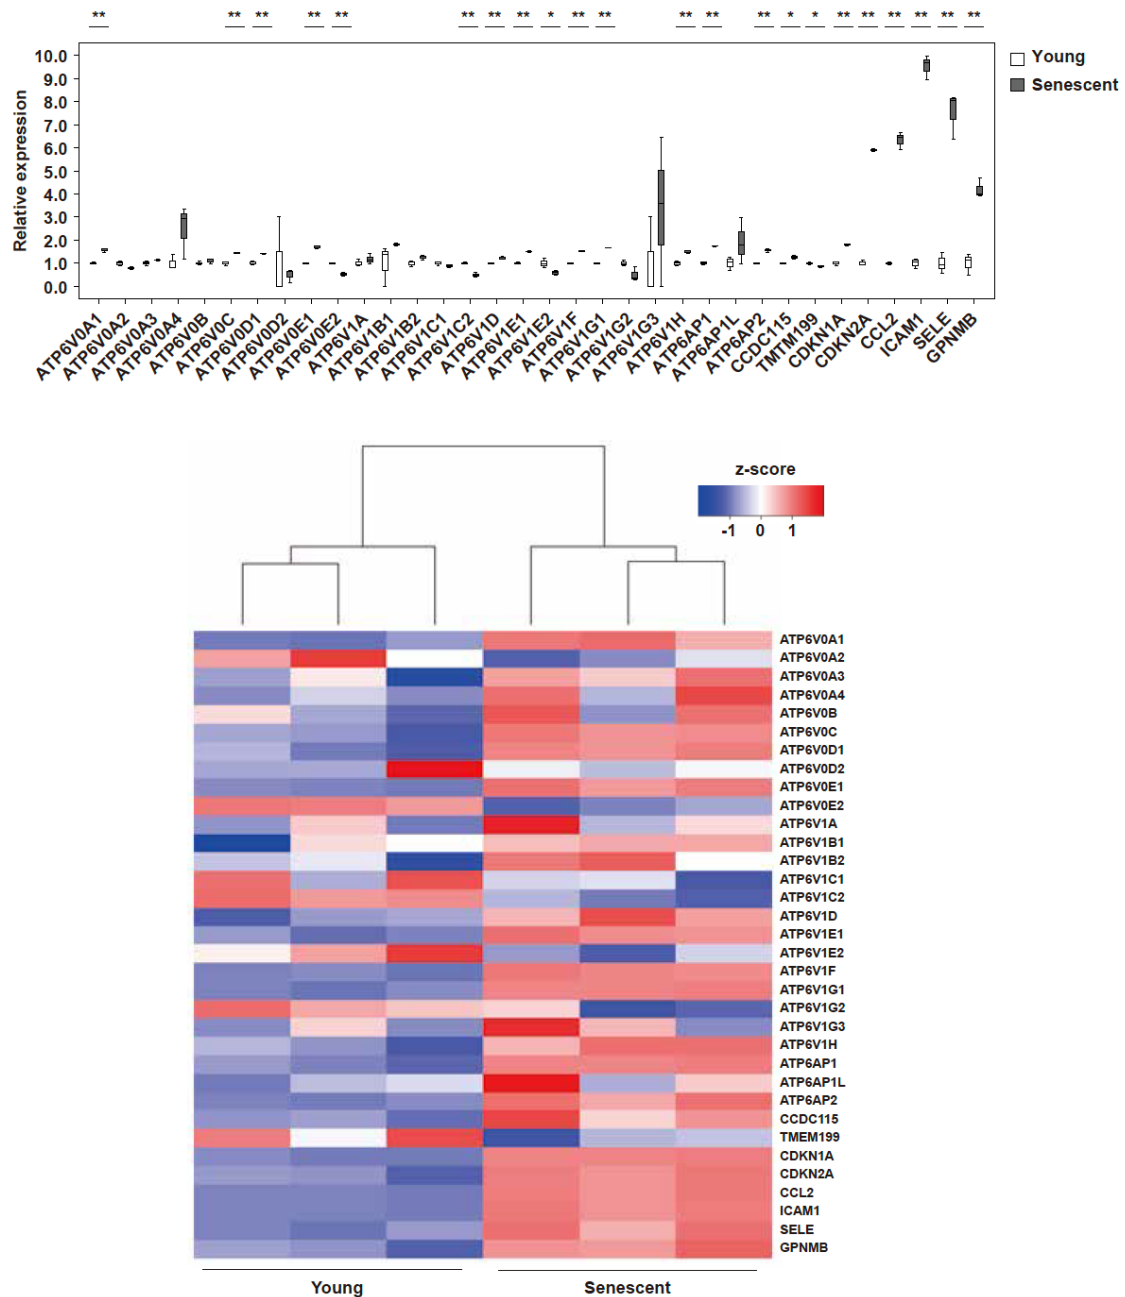

**Supplementary Figure 3. Expression of V-type ATPase components in young and senescent endothelial cells.**

Young and senescent HUVECs underwent RNA sequencing analysis. The expression of V-type ATPase components along with senescence markers is shown (n=3, respectively). The data were analyzed by the two-tailed Student's t-test and are presented as box and whisker plots. \*P<0.05, \*\*P<0.01.

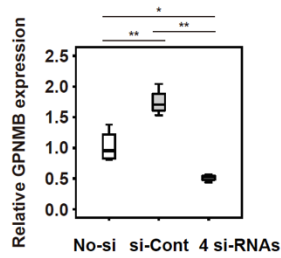

#### Supplementary Figure 4. Expression of Gpnmb after introduction of siRNAs.

Relative expression of *GPNUMB* in replicative senescent HUVECs after introduction of siRNAs for the MITF/TFE transcription factors (4 si-RNAs: si-MITF, si-TFEB, si-TFEC, and si-TFE3), control siRNA (si-Cont), or no siRNA (No-si) (n=4, 4, 3). Data were analyzed by two-way ANOVA analysis followed by Tukey's multiple comparison. \*P<0.05, \*\*P<0.01. The data are shown as box and whisker plots.

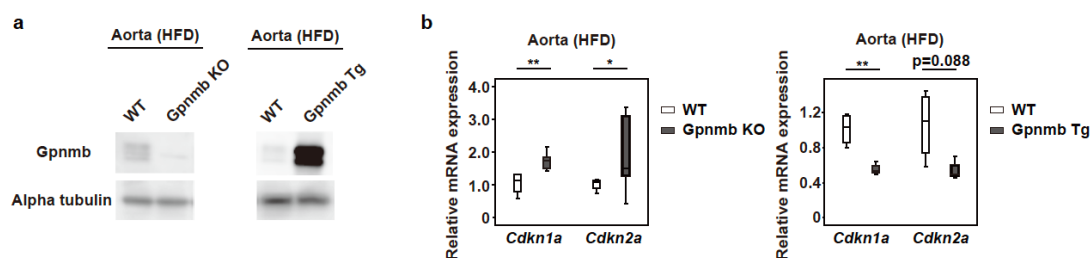

### Supplementary Figure 5. Expression of Gpnmb and senescence markers in Gpnmb KO/Tg mice.

**a**, Western blot analysis for expression of Gpnmb in the aortas of Gpnmb KO/Tg mice or littermate controls (WT) on the HFD. Original blots are presented in Supplementary Figure 10. **b**, qPCR for relative expression of *Cdkn1a* and *Cdkn2a* in the aortas of Gpnmb KO/Tg mice or littermate controls (WT) on the HFD (n=4 for WT and n=8 for KO, n=4 for WT and n=3 for Tg). The data were analyzed by the two-tailed Student's t-test (**b**). \*\*P<0.01. The data are shown as box and whisker plots (**b**).

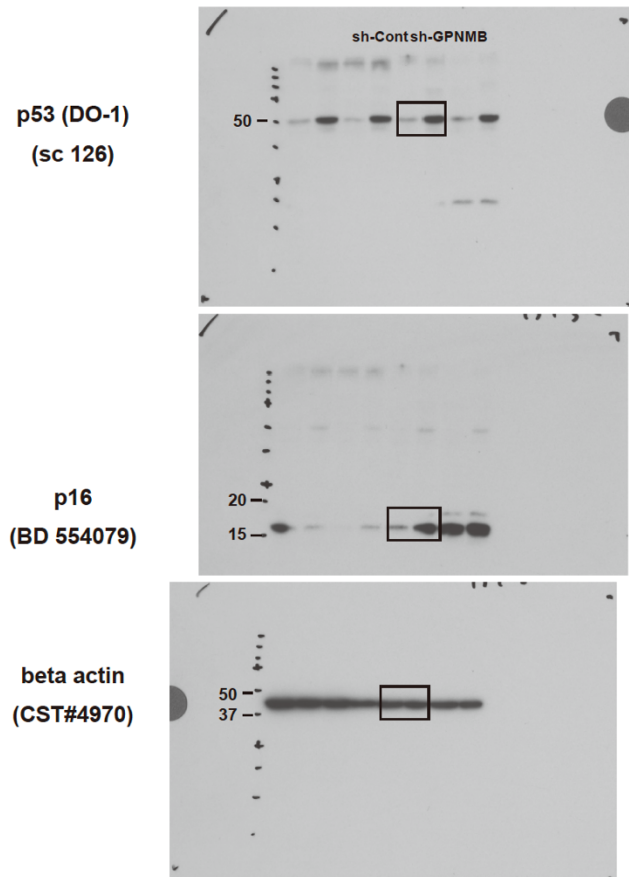

**Supplementary Figure 6. Full blots of Figure 1b**

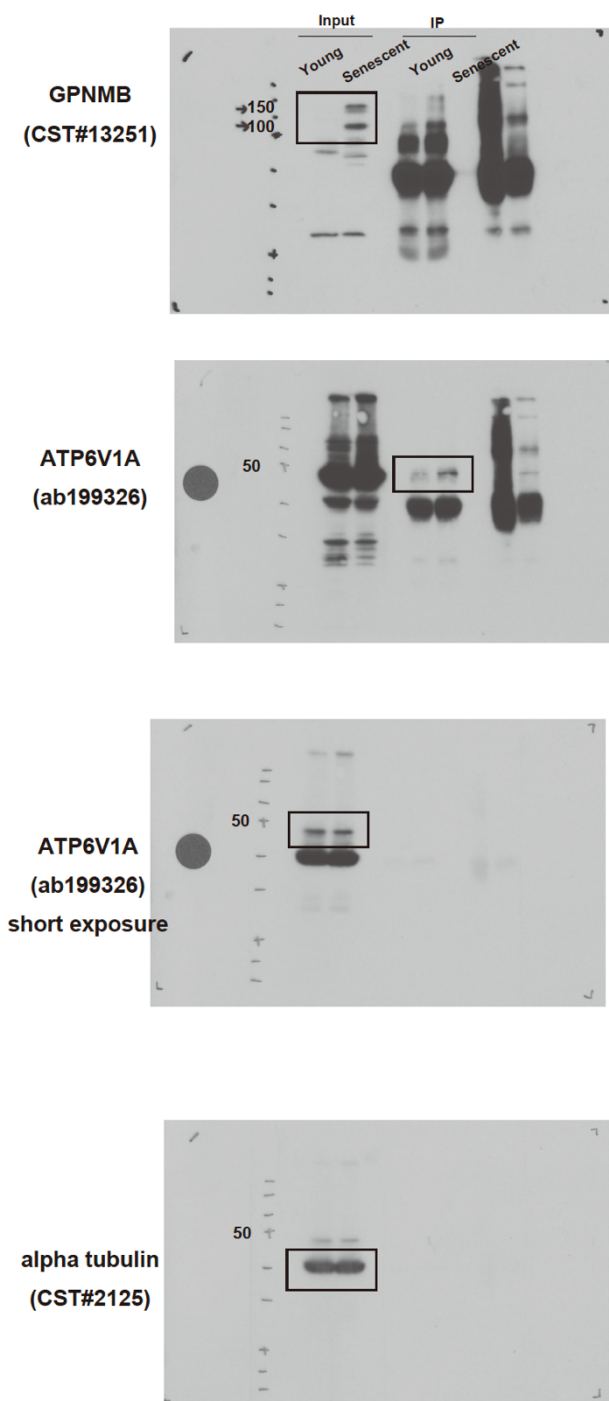

**Supplementary Figure 7. Full blots of Figure 3b**

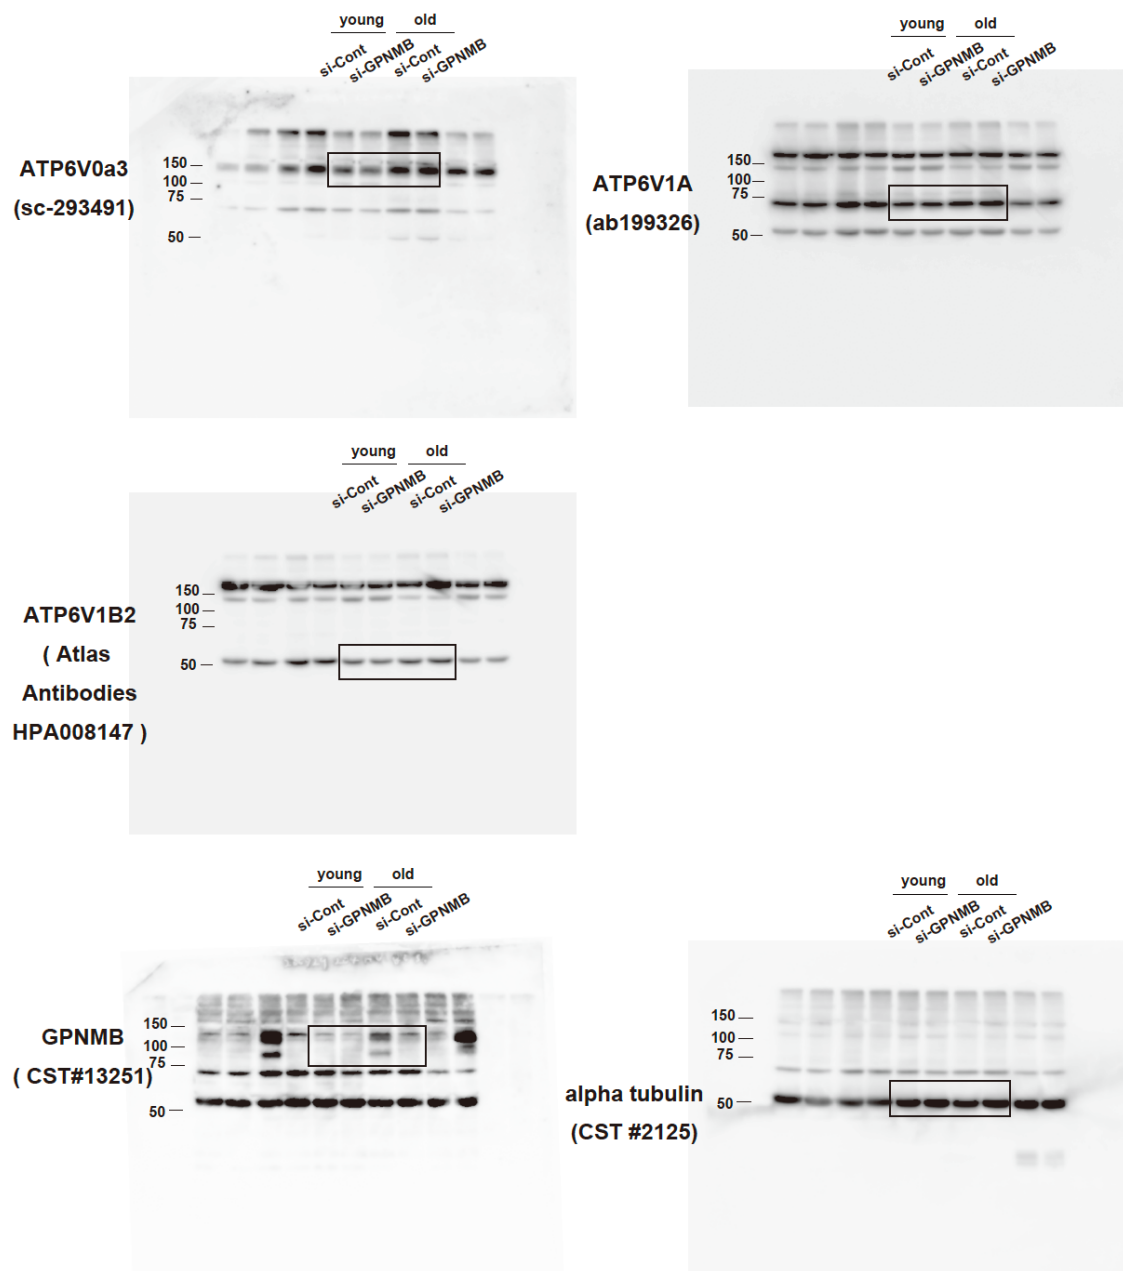

**Supplementary Figure 8. Full blots of Figure 3c**

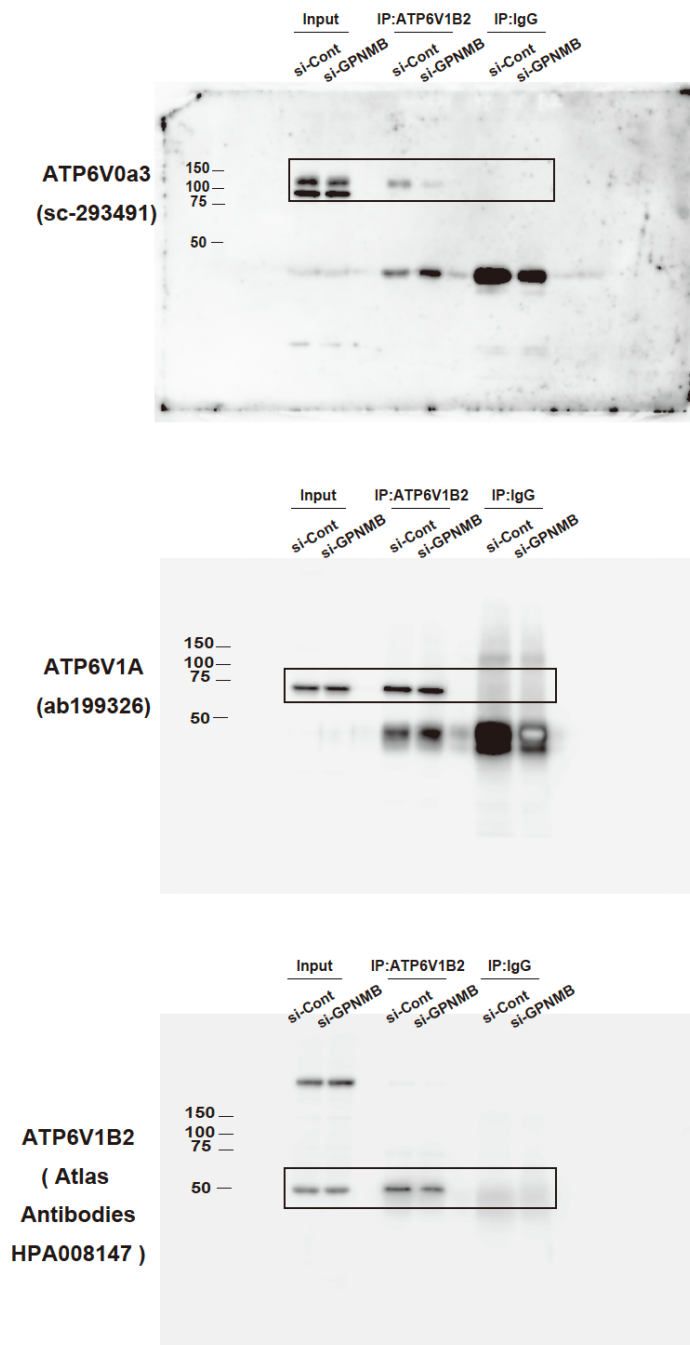

**Supplementary Figure 9. Full blots of Figure 3d**

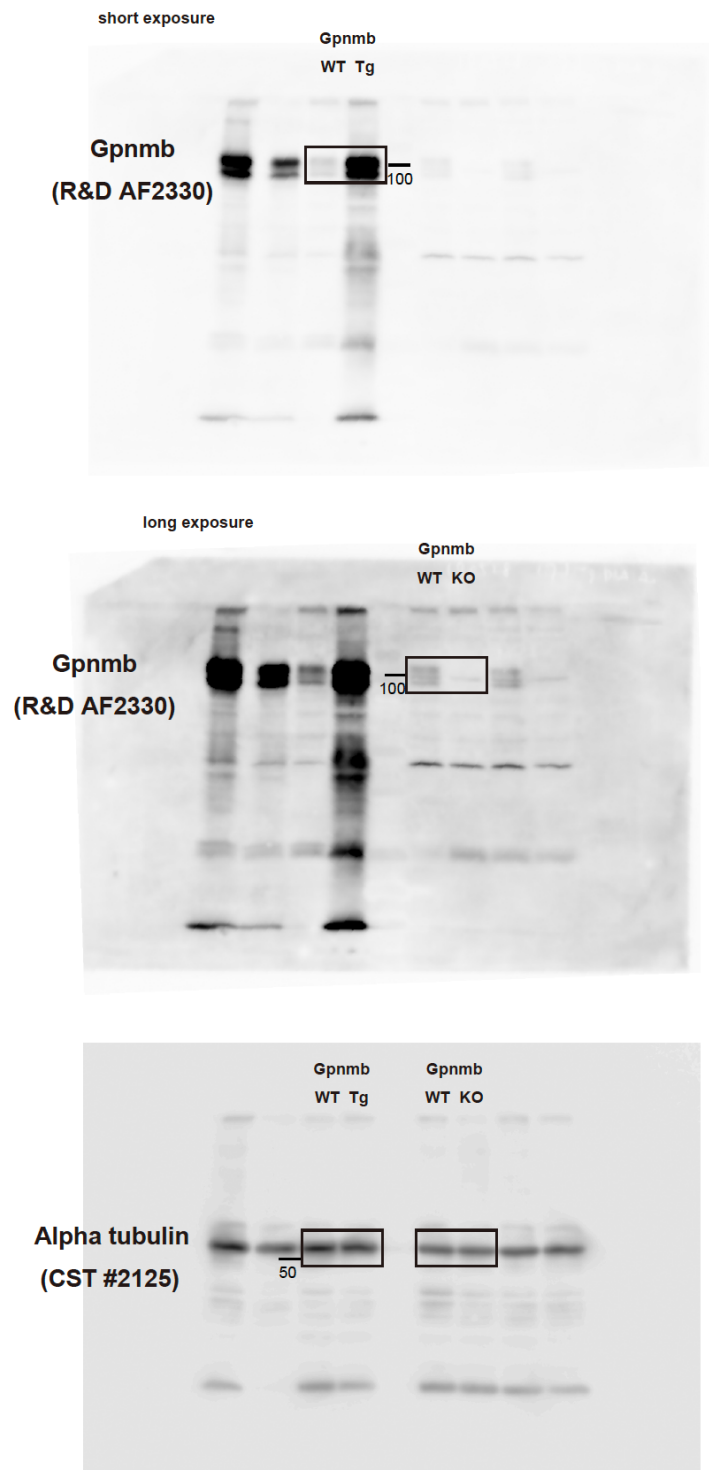

**Supplementary Figure 10. Full blots of Supplementary Figure 5a**
